# Supplementary material for: Thin films composed of Zr-doped In2O3 grains rich in fracture surfaces and cracks for photoelectrochemical water oxidation
Source: Royal Society of Chemistry journal article supplement (doi:10.1039/d1dt03690d), 2021-12-27
Supplement: d1dt03690d1.pdf [file d1dt03690d1.pdf]

## Supplementary information

### Thin films composed of Zr-doped $\text{In}_2\text{O}_3$ grains rich in fracture surfaces and cracks for photoelectrochemical water oxidation

Shu Yang,<sup>a</sup> Changlong Chen,<sup>\*a</sup> Yuling Wei,<sup>b</sup> Leshuang Wang,<sup>a</sup> Qiang Liu,<sup>a</sup> Liya Jiang<sup>a</sup>  
and Guobao Li<sup>a</sup>

<sup>a</sup> *School of Chemistry and Chemical Engineering, University of Jinan, Jinan, 250022, Shandong, China*

<sup>b</sup> *State Key Laboratory of Biobased Material and Green Papermaking, Qilu University of Technology (Shandong Academy of Sciences), Jinan 250353, Shandong, China*

\*Corresponding author.

*E-mail address:* chm\_chencl@ujn.edu.cn (C. Chen)

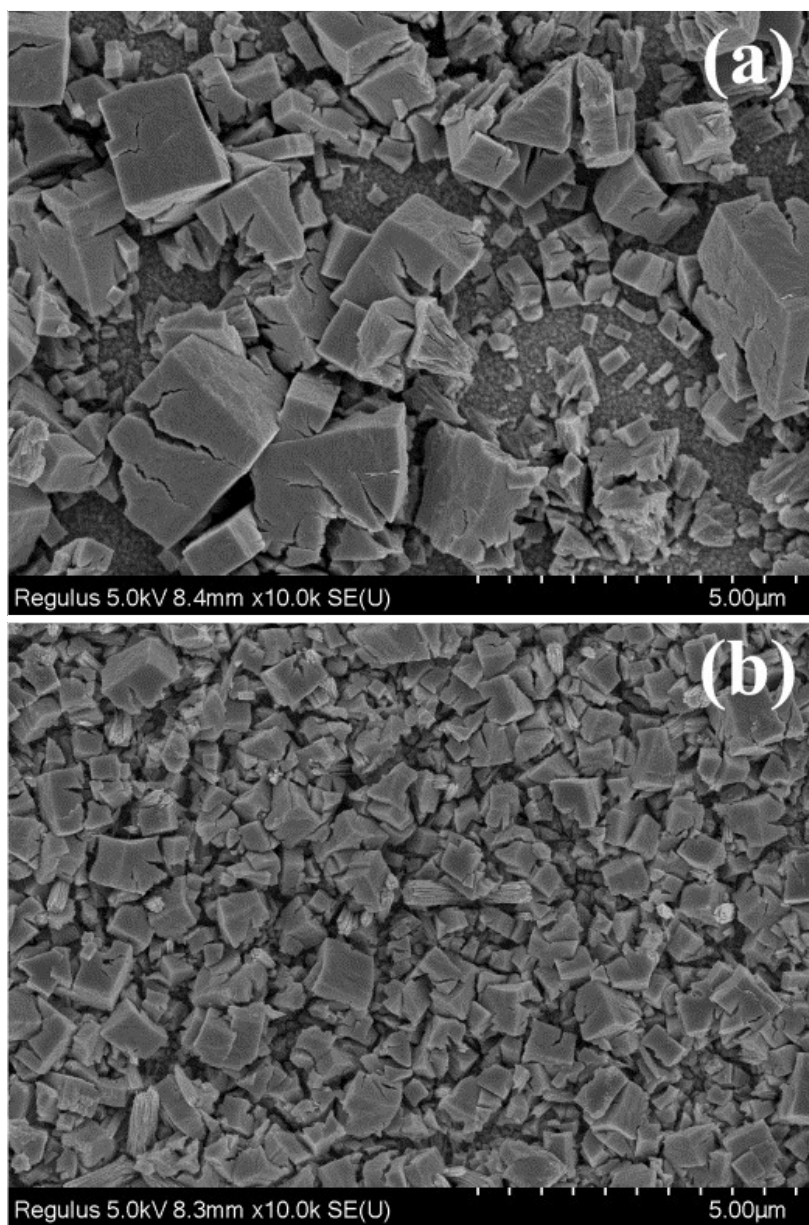

**Fig. S1** SEM images of undoped  $\text{In}_2\text{O}_3$  (a) and 14.5%-Zr- $\text{In}_2\text{O}_3$  (b) samples.

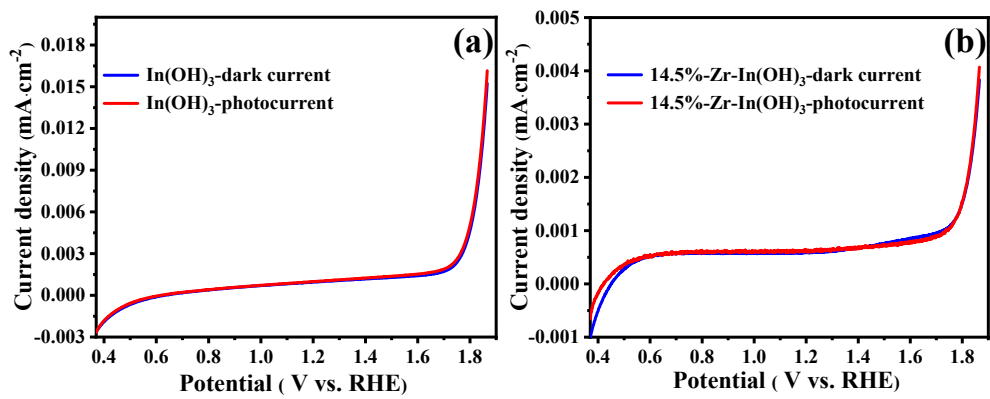

**Fig. S2** LSV curves of the undoped and 14.5%-Zr-In(OH)<sub>3</sub> films measured under AM1.5G illumination at 100 mW·cm<sup>-2</sup> and in dark.

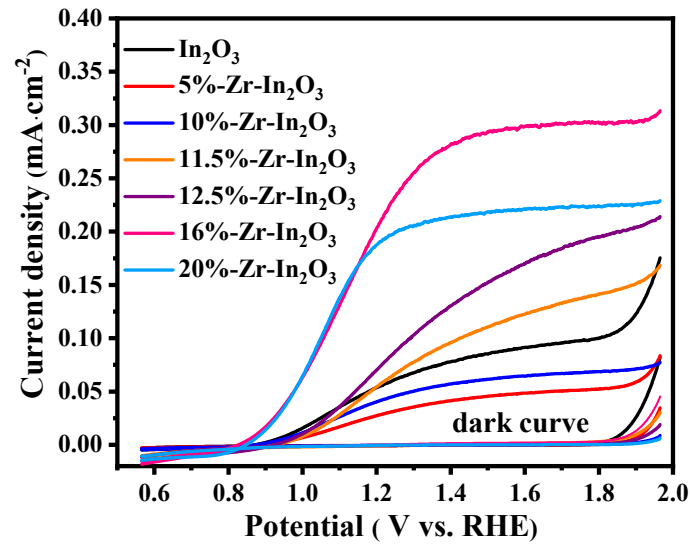

Fig. S3 LSV curves of undoped and Zr-doped  $\text{In}_2\text{O}_3$  films measured under AM1.5G illumination at  $100\text{ mW}\cdot\text{cm}^{-2}$  and in dark.

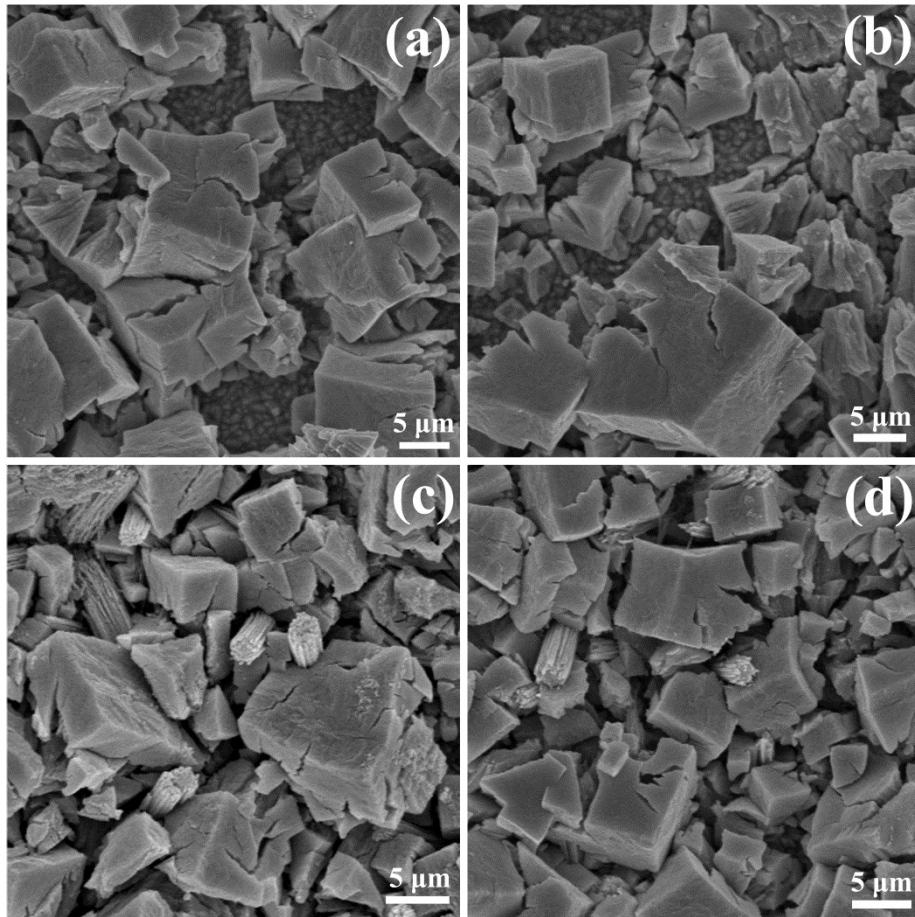

**Fig. S4** SEM images of In<sub>2</sub>O<sub>3</sub> before (a) and after (b) PEC test; SEM images of 14.5%-Zr-In<sub>2</sub>O<sub>3</sub> before (c) and after (d) PEC test.

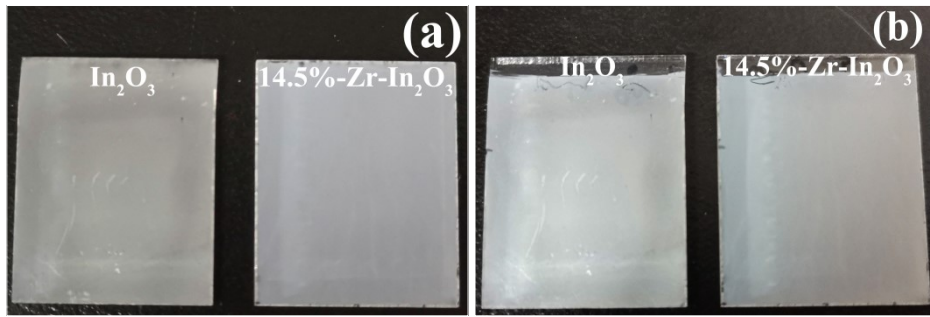

Fig. S5 The optical photos of  $\text{In}_2\text{O}_3$  and  $14.5\%-\text{Zr}-\text{In}_2\text{O}_3$  samples before (a) and after (b) PEC tests.

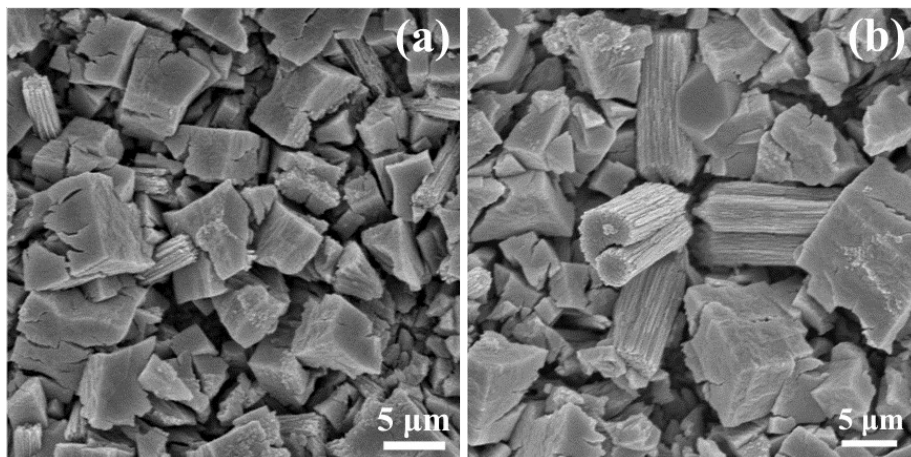

**Fig. S6** SEM images of 14.5%-Zr-In<sub>2</sub>O<sub>3</sub> prepared from 14.5%-Zr-In(OH)<sub>3</sub> with a heating rate of (a) 0.5°C·min<sup>-1</sup> and (b) 3°C·min<sup>-1</sup>.

**Table S1** The contents of In, O and Zr in the Zr-doped In<sub>2</sub>O<sub>3</sub> samples measured by EDS.

| <b>Sample</b>                               | <b>Element</b> | <b>Normalized quality<br/>C [wt.%]</b> | <b>Atomic number C<br/>[atm.%]</b> |
|---------------------------------------------|----------------|----------------------------------------|------------------------------------|
| <b>12.5%-Zr-In<sub>2</sub>O<sub>3</sub></b> | In             | 72.85                                  | 29.99                              |
|                                             | O              | 22.96                                  | 67.84                              |
|                                             | Zr             | 4.18                                   | 2.17                               |
| <b>14.5%-Zr-In<sub>2</sub>O<sub>3</sub></b> | In             | 74.37                                  | 31.90                              |
|                                             | O              | 21.38                                  | 65.81                              |
|                                             | Zr             | 4.25                                   | 2.30                               |
| <b>16%-Zr-In<sub>2</sub>O<sub>3</sub></b>   | In             | 69.17                                  | 26.82                              |
|                                             | O              | 25.34                                  | 70.51                              |
|                                             | Zr             | 5.49                                   | 2.68                               |
| <b>20%-Zr-In<sub>2</sub>O<sub>3</sub></b>   | In             | 67.63                                  | 25.67                              |
|                                             | O              | 26.21                                  | 71.39                              |
|                                             | Zr             | 6.16                                   | 2.94                               |



**Table S2** PEC water splitting performance of some In<sub>2</sub>O<sub>3</sub>-based photoanodes.

| Photoanodes                                                                     | Synthesis Method                  | Substrate | Light Source            | Electrolyte                                 | Photocurrent Density                          | Ref.      |
|---------------------------------------------------------------------------------|-----------------------------------|-----------|-------------------------|---------------------------------------------|-----------------------------------------------|-----------|
| cubic In <sub>2</sub> O <sub>3</sub>                                            | chemical bath reaction method     | FTO       | 35 mW·cm <sup>-2</sup>  | 0.1M Na <sub>2</sub> SO <sub>4</sub> (pH=7) | 1.15 mA·cm <sup>-2</sup> at 1.51 V vs RHE     | 1         |
| In <sub>2</sub> O <sub>3</sub> nanorods                                         | electrodeposition                 | FTO       | -                       | 1M CH <sub>3</sub> OH, NaOH (pH=12)         | 2.0 μA·cm <sup>-2</sup> at 0 V vs Ag/AgCl     | 2         |
| In <sub>2</sub> O <sub>3</sub> nanostructures                                   | solvothermal method               | FTO       | 100 mW·cm <sup>-2</sup> | 0.1M NaOH                                   | 0.4 mA·cm <sup>-2</sup> at 1.30 V vs RHE      | 3         |
| In <sub>2</sub> O <sub>3</sub> /In <sub>2</sub> S <sub>3</sub> heterostructures | two-step hydrothermal method      | FTO       | -                       | 1 M NaOH                                    | 0.53 mA·cm <sup>-2</sup> at 1.23 V vs RHE     | 4         |
| Mn-doped In <sub>2</sub> O <sub>3</sub> film                                    | RF-magnetron sputtering technique | Si        | 160 mW·cm <sup>-2</sup> | 1 M NaOH                                    | 120 μA·cm <sup>-2</sup> at 0.4 V vs Ag/AgCl   | 5         |
| Indium Oxide Microcubes                                                         | chemical-bath-deposited           | ITO       | 100 mW·cm <sup>-2</sup> | 1M KOH                                      | 0.44 mA·cm <sup>-2</sup> at 0.5 V vs Ag/AgCl  | 6         |
| Sub-50 nm nanoporous In <sub>2</sub> O <sub>3</sub> spheres                     | solvothermal                      | FTO       | -                       | 0.1M Na <sub>2</sub> SO <sub>4</sub>        | 1.9 mA·cm <sup>-2</sup> at 0.65 V vs Ag/AgCl  | 7         |
| In <sub>2</sub> O <sub>3</sub> Nanowires                                        | chemical vapor deposition (CVD)   | Si        | 270 mW·cm <sup>-2</sup> | 1 M NaOH                                    | 0.21 mA·cm <sup>-2</sup> at 0.22 V vs Ag/AgCl | 8         |
| Nitrogen doped In <sub>2</sub> O <sub>3</sub> thin film                         | solvothermal                      | FTO       | 130 mW·cm <sup>-2</sup> | 1.0 M KOH                                   | 140 μA·cm <sup>-2</sup> at 0.4 V vs Ag/AgCl   | 9         |
| Zr-doped In <sub>2</sub> O <sub>3</sub> film                                    | hydrothermal method               | FTO       | 100 mW·cm <sup>-2</sup> | 0.1 M NaOH                                  | 0.30 mA·cm <sup>-2</sup> at 1.50 V vs RHE     | This work |

**Table S3** The Nyquist plots fitting results of the undoped  $\text{In}_2\text{O}_3$  and 14.5%-Zr- $\text{In}_2\text{O}_3$ .

| <b>Sample</b>                                      | <b><math>R_s</math> (<math>\Omega\cdot\text{cm}^2</math>)</b> | <b><math>R_{ct}</math> (<math>\Omega\cdot\text{cm}^2</math>)</b> |
|----------------------------------------------------|---------------------------------------------------------------|------------------------------------------------------------------|
| <b>undoped <math>\text{In}_2\text{O}_3</math></b>  | 31.21                                                         | 4364                                                             |
| <b>14.5%-Zr-<math>\text{In}_2\text{O}_3</math></b> | 28.27                                                         | 2885                                                             |

**Table S4** Flat-band potentials and donor densities originated from the linear portion of the Mott–Schottky plots that shown in Fig. 9b in the main text.

| <b>Sample</b>                               | <b>Flat-band potential<br/>(V vs. RHE)</b> | <b>Donor density<br/>(cm<sup>-3</sup>)</b> |
|---------------------------------------------|--------------------------------------------|--------------------------------------------|
| <b>undoped In<sub>2</sub>O<sub>3</sub></b>  | 0.55                                       | 3.60×10 <sup>21</sup>                      |
| <b>14.5%-Zr-In<sub>2</sub>O<sub>3</sub></b> | 0.49                                       | 10.88×10 <sup>21</sup>                     |

## References

- 1 D. Sariket, S. Shyamal, P. Hajra, H. Mandal, A. Bera, A. Maity, S. Kundu and C. Bhattacharya, *Materials Chemistry and Physics*, 2017, **201**, 7-17.
- 2 J. Gan, X. Lu, T. Zhai, Y. Zhao, S. Xie, Y. Mao, Y. Zhang, Y. Yang and Y. Tong, *Journal of Materials Chemistry*, 2011, **21**, 14685-14692.
- 3 C. Chen, J. Moir, N. Soheilnia, B. Mahler, L. Hoch, K. Liao, V. Hoepfner, P. O'Brien, C. Qian, L. He and G. A. Ozin, *Nanoscale*, 2015, **7**, 3683-3693.
- 4 H. Xu, H. Chen, S. Chen, K. Wang and X. Wang, *International Journal of Hydrogen Energy*, 2021, **46**, 32445-32454.
- 5 X. Sun, X. Fu, T. You, Q. Zhang, L. Xu, X. Zhou, H. Yuan and K. Liu, *Electronic Materials Letters*, 2018, **14**, 733-738.
- 6 M. G. Mali, H. Yoon, H. Kim, B. Joshi, S. S. Al-Deyab and S. S. Yoon, *ChemPhysChem*, 2015, **16**, 3450-3457.
- 7 Q. Liu, W. Zhang, R. Liu and G. Mao, *European Journal of Inorganic Chemistry*, 2015, **2015**, 845-851.
- 8 M. Meng, X. Wu, X. Zhu, X. Zhu and P. K. Chu, *ACS Applied Materials & Interfaces*, 2014, **6**, 4081-4088.
- 9 K. R. Reyes-Gil, E. A. Reyes-García and D. Raftery, *The Journal of Physical Chemistry C*, 2007, **111**, 14579-14588.
